# Supplementary material
Source: Elsevier journal article supplement (https://www.sciencedirect.com/science/article/pii/S1695403321001715)
Supplement: mmc1 [file S1695403321001715:mmc1.doc]

**ANPEDIA-20-985**

**DÉFICIT DE HORMONA DE CRECIMIENTO: INFLUENCIA DE LA PUBERTAD EN LA RESPUESTA AL TRATAMIENTO**

**Título abreviado:** Déficit de hormona de crecimiento: pubertad y respuesta al tratamiento

María José Sánchez Maloa*,Juan Hidalgo Sanzb, Cristina Hernández Tejedorb, María García Venturac, Marta Ferrer Lozanod,Jose Ignacio Labarta Aizpúnd, Antonio de Arriba Muñozd

aServicio de Pediatría. Hospital Reina Sofía, Tudela, Navarra, España

bServicio de Pediatría. Hospital Universitario Miguel Servet, Zaragoza, España

cCentro de Salud Valdespartera, Zaragoza, España

dUnidad de Endocrinología Pediátrica. Hospital Universitario Miguel Servet, Zaragoza, España

*Correo electrónico: [mjsanchezmalo@gmail.com](mailto:mjsanchezmalo@gmail.com)

**Introducción.** La talla baja es motivo de consulta frecuente en endocrinología pediátrica, precisando en ocasiones tratamiento con hormona de crecimiento. El objetivo del estudio fue analizar la respuesta al tratamiento en función de su inicio en etapa puberal o prepuberal y analizar el posible beneficio de un comienzo precoz.

**Pacientes y Métodos.** Estudio longitudinal, retrospectivo y observacional en 139 pacientes tratados por déficit de GH idiopático (grave o parcial) hasta talla adulta. Principales variables estudiadas: a)antecedentes familiares: talla materna, paterna y genética; b)antecedentes perinatales; c)antropometría durante el seguimiento y al inicio puberal: peso, talla, IMC; d)variables durante el seguimiento y al inicio puberal: velocidad de crecimiento, edad ósea y pronóstico de crecimiento. Variables de respuesta final: talla adulta, talla adulta respecto a talla genética, talla adulta respecto al pronóstico de crecimiento inicial, talla adulta respecto a talla al inicio del tratamiento y talla adulta respecto a talla al inicio puberal.

**Resultados.** La ganancia puberal total fue de 0,84±0,6 DE. Un 61,9% de los pacientes iniciaron tratamiento con hormona de crecimiento en prepubertad. El inicio del tratamiento en etapa prepuberal y una mayor ganancia puberal total se relacionaron con una mejor talla final (p=0,001, y r=0,507, p=0,00 respectivamente). Además, una mayor duración del tratamiento en prepubertad se correlacionó con una mejor respuesta final (r=0,328, p=0,00).

**Conclusiones.** El inicio del tratamiento en prepubertad y una mayor duración durante este periodo son factores determinantes para alcanzar una mejor respuesta a largo plazo. La ganancia puberal total fue mayor en los pacientes que iniciaron el tratamiento en etapa puberal.

**Palabras clave:** hormona crecimiento, hormona de crecimiento humana, pubertad, maduración sexual.

**GROWTH HORMONE DEFICIT: INFLUENCE OF PUBERTY ON THE RESPONSE TO TREATMENT**

**Introduction.** Short stature is the most frequent reason for consultation in Pediatric Endocrinology consultations and sometimes requires treatment with growth hormone. The aim of the study was to analyze the response to treatment based on its onset in pubertal or prepubertal stages and to analyze the possible benefit of an early onset.

**Patients and Methods.** Longitudinal, retrospective and observational study in 139 patients treated for idiopathic growth hormone deficiency up to adult height. Main variables studied: a) genetic background: maternal, paternal and genetic height; b) perinatal history; c) anthropometry during follow-up and at pubertal onset: weight, height, body mass index; d) variables during follow-up and at pubertal onset: growth rate, bone age and growth prognosis. Final response variables: adult height, adult height with respect to target height, adult height with respect to initial growth prediction, adult height with respect to initial height at the start of treatment and adult height with respect to height at pubertal onset.

**Results.** Total pubertal gain was 0.84 ± 0.6 SD. 61,9% of the patients started treatment with rhGH in prepuberty. The initiation of treatment in the prepubertal stage and a higher total pubertal gain are correlated with a better final height (p = 0,001 and r = 0,507, p = 0,00 respectively). Furthermore, a longer duration of treatment in pre-puberty is correlated with a better final response (r = 0,328, p = 0,00).

**Conclusions.** The start of treatment in the prepubertal stage and its longer duration during this period are determining factors to achieve a good long-term response. Total pubertal gain was greater in patients who started treatment in the pubertal stage.

**Keywords:** growth hormone, human growth hormone, puberty, sexual maturation.

**Introducción**

La pubertad y el crecimiento son dos fenómenos fisiológicos muy relevantes que conllevan enormes cambios(1). Con el aumento de la secreción gonadal de esteroides se inicia el brote de crecimiento puberal(2). Esto determina la velocidad de crecimiento en pubertad, la maduración sexual y la edad de la menarquia(3). La pubertad normal comienza en niños a partir de 9 años con un tamaño testicular igual o mayor de 4 ml medido con el orquidómetro de Prader, y en niñas a partir de 8 años cuando aparece el botón mamario(4). La importancia del crecimiento durante la pubertad radica en que supone aproximadamente el 25% de la altura postnatal total, siendo ligeramente mayor en los hombres(5). Sus alteraciones suponen un motivo frecuente de consulta de gran interés clínico(1).

La talla baja es el motivo de consulta más frecuente en endocrinología pediátrica(6). Se considera talla baja a aquella menor de -2 Desviaciones Estándar (DE) de la media de la población de referencia para igual edad y sexo(7).

El déficit de hormona del crecimiento (GH) supone una causa importante de talla baja en la infancia(8). Se manifiesta de manera diferente según la etapa de desarrollo (precoz tras el nacimiento, durante la infancia, en la pubertad o en la edad adulta), la causa o mecanismo (genético, adquirido o idiopático), la intensidad del déficit y si es la única hormona afectada en la hipófisis, se combina con otras hormonas hipofisarias o forma parte de un síndrome complejo(9). Está ampliamente demostrada la importancia de un diagnóstico y tratamiento precoz del déficit de GH (DGH) debido a su influencia en el adecuado desarrollo neurológico, metabólico y auxológico(8).

El objetivo principal del tratamiento con rhGH en estos pacientes es normalizar la talla durante la infancia y adolescencia y alcanzar una talla adulta (TA) en rango normal y acorde con su talla genética (TG)(10,11). Diferentes ensayos clínicos demuestran la eficacia del tratamiento con rhGH para que estos niños consigan un crecimiento recuperador(7).

Múltiples estudios apoyan que el inicio del tratamiento con rhGH a una edad temprana favorece que los pacientes alcancen una TA acorde a su TG. Así, el tratamiento debe iniciarse lo antes posible para lograr la máxima respuesta en el crecimiento(10,12). Otros estudios defienden que la exposición total a rhGH durante los años prepúberes es un factor significativo, y correlacionan la ganancia de talla en prepubertad con la ganancia de talla total, mostrando la importancia de comenzar el tratamiento antes del inicio puberal(13,14).

Por tanto, nos planteamos como objetivo del estudio evaluar la respuesta al tratamiento en función del inicio en etapa puberal o prepuberal, estudiar la posible correlación de un inicio del tratamiento en etapa prepuberal con una mejor respuesta final y, en aquellos que inician el tratamiento en prepubertad, analizar el posible beneficio de un comienzo precoz del mismo.

**Pacientes y métodos**

Población a estudio:

Se trata de un estudio longitudinal, retrospectivo y observacional con pacientes controlados en Consultas de Endocrinología Infantil de un hospital terciario, nacidos entre 1989 y 2004, que habían sido tratados por DGH idiopático. Se define DGH idiopático grave si el pico de GH máxima en los test de estímulo es menor a 3 ng/ml, y DGH parcial si se encuentra entre 3-10 ng/ml.

Los criterios de inclusión en el estudio fueron: pacientes con talla menor de -2 DE para edad y sexo al diagnóstico de DGH, con GH <10 ng/mL en dos test de estímulo, que recibieron tratamiento con GH a dosis sustitutivas durante al menos un año y alcanzaron la casi-TA. Se considera casi-TA cuando el ritmo de crecimiento es <0,5 cm/año y la edad ósea es de 15 años en mujeres o 17 años en varones. Se ha utilizado este concepto cuando se hace referencia a la TA ya que los pacientes fueron dados de alta antes de alcanzar la TA final. Los criterios de exclusión del estudio fueron: DGH de etiología orgánica, pacientes con patología adicional que pudiera condicionar el crecimiento y pronóstico de talla (cáncer, cardiopatías congénitas, parálisis cerebral infantil, síndromes o cromosomopatías), pacientes que habían recibido tratamiento concomitante con análogos de hormona liberadora de la hormona luteinizante (LHRH), pacientes diagnosticados de DGH con un test de estímulo, o pacientes que recibieron tratamiento con rhGH de manera discontinua, excluyéndose del estudio 97 pacientes (n=97), siendo el grupo final de 139 pacientes (n=139). No se excluyó ningún paciente por mala respuesta o efectos adversos al tratamiento (Figura 1).

Recolección de datos a estudio:

Las variables estudiadas fueron: 1) antecedentes genéticos: talla materna, talla paterna y TG; 2) antecedentes perinatales: tipo de gestación, edad gestacional al nacimiento, tipo de parto, patología perinatal asociada y antropometría neonatal; 3) antropometría durante el seguimiento: peso, talla, índice de masa corporal (IMC); 4) antropometría al inicio puberal (considerando inicio puberal en mujeres la aparición de telarquia y en varones el incremento del tamaño testicular ≥4 ml): peso, talla, IMC; 5) variables durante el seguimiento: velocidad de crecimiento (VC), edad ósea, pronóstico de crecimiento (PC) y TA; 6) variables al inicio puberal: VC, edad ósea y PC; 7) resultados analíticos: estudio del eje GH-IGF (pico máximo de GH tras test de estímulo), IGF-1 (factor de crecimiento insulínico tipo 1), IGF-BP3 (proteína transportadora 3 del factor de crecimiento similar a la insulina), 8) tratamiento: dosis de rhGH (mcg/kg/día).

Las variables talla, peso e IMC fueron calculadas y expresadas en valor absoluto y en DE según los Estudios Españoles de Crecimiento 2010(15). La variable VC fue expresada en valor absoluto y en DE según los Estudios Españoles de Crecimiento 2010(16). Para el cálculo de la edad ósea se utilizó el atlas radiográfico de maduración ósea de Greulich y Pyle (17) y se calculó el pronóstico de TA basado en la talla y la edad ósea, por el método de Bayley-Pinneau(18). El desarrollo puberal fue evaluado según los criterios de Tanner. Para realizar la comparación del crecimiento en pubertad se utilizó el estudio longitudinal de niños españoles normales desde el nacimiento hasta edad adulta(19). Todas las variables estudiadas fueron evaluadas 1 año antes, al inicio del tratamiento con rhGH, al inicio puberal y anualmente hasta alcanzar la casi-TA.

Como criterios de respuesta final al tratamiento se consideraron:

1. TA (DE)
2. TA con respecto a la TG (DE)
3. TA con respecto al PC inicial (DE)
4. TA con respecto a la talla al inicio del tratamiento (TI) (DE)
5. TA con respecto a la talla al inicio puberal (TIP) (DE)

Se analizó la eficacia del tratamiento con rhGH en la TA en el DGH, la respuesta al mismo en función de su inicio en la etapa puberal o prepuberal; y se estudió la posible correlación de un inicio del tratamiento en la etapa prepuberal con una mejor respuesta final. Además, se analizó a los pacientes que iniciaron tratamiento en la etapa prepuberal, y se estudió si un inicio precoz del mismo se correlaciona con una mejor respuesta final.

Análisis estadístico:

Se realizó estudio de normalidad previo al estudio estadístico y posteriormente estudio de comparación de medias y correlaciones. Para estudiar la relación entre variables categóricas se utilizó la prueba de Chi-Cuadrado. Para estudiar la relación entre variables cuantitativas se aplicó el Coeficiente de Correlación de Pearson. Para estudiar la relación entre variables cuantitativas y categóricas se utilizó la t de Student. Para el estudio estadístico se utilizó el programa SPSS v.15, considerando significación estadística p<0,05.

Este proyecto de investigación ha sido aprobado por el Comité de Ética de la Investigación de la Comunidad de Aragón (CEICA).

**Resultados**

La muestra se compone de 139 pacientes (96 mujeres y 43 varones). El 71,2% correspondían a DGH grave, y el 28,2% a DGH parcial. La cifra media de GH en los test de estímulo al diagnóstico fue 4,04±2,57 ng/ml (0 ng/ml-9,86 ng/ml). La edad media al inicio de tratamiento fue de 11,1±2,5 años, con una duración de 4,2±2 años y una dosis media inicial de 26,14±2 mcg/kg/día, siendo de 26,02±2,52 mcg/kg/día en aquellos que inician tratamiento en prepubertad, y de 26,33±2,14 mcg/kg/día en los que lo hacen en pubertad, sin diferencias estadísticamente significativas entre ellos (p=0,454). Las dosis continuaron siendo similares durante el desarrollo puberal. La edad media al final del tratamiento fue de 15,3±1,2 años. La TG fue de -1,3±0,7 DE, la TI de -2,5±0,4 DE y el PC inicial de -2,19±0,6 DE, es decir, 150,35 ± 3,40 cm en mujeres y 164,9 ± 2,87 cm en varones. La menarquia tuvo lugar con una edad media de 13,67±1 años.

Los datos del nacimiento, tallas de los padres y talla genética se muestran en la tabla 1. Las principales características descriptivas y su evolución durante el seguimiento se muestran en la figura 2. La evolución de la talla en función del inicio de tratamiento en prepubertad o pubertad se muestra en la tabla 2.

Un 61,9% de los pacientes iniciaron el tratamiento con rhGH en prepubertad (40,3% de las mujeres y 21,6% de los varones), con una edad cronológica al inicio del tratamiento de 9,87±1,9 años en mujeres y 10,14±3,2 años en varones. Desde el inicio del tratamiento con rhGH al inicio puberal pasaron 1±2,2 años, siendo 1,4±2,9 años en varones y 0,8±1,7 años en mujeres. En el 38,1% que comenzaron el tratamiento sustitutivo tras el inicio puberal, las edades iniciales fueron de 12,6±0,9 años en mujeres y 14,19±1,4 años en varones.

Se alcanzó una TA que supera en DE a la TI con respecto a su población de referencia (TA= -1,28±0,6 DE y TI= -2,5±0,4 DE), siendo de 154,5±3,7 cm en mujeres, y 165,6±4,1 cm en varones. La TA con respecto a la TG fue de 0,06±0,7 DE, y la TA con respecto al PC inicial de 0,9±0,6 DE. Se constató un incremento de la TA con respecto a la TI de 1,2±0,6 DE, siendo de +0,4±0,5 DE en prepubertad y de +0,84±0,6 DE en pubertad, sin diferencias significativas entre sexos. La TA aumentó 0,57±0,6 DE con respecto al PC al inicio puberal. La ganancia puberal total (GPT) fue de 16,96±3,9 cm en mujeres y 25,04±5,3 cm en varones. Este incremento fue mayor en los pacientes que iniciaron el tratamiento en pubertad.

El crecimiento de la muestra durante la pubertad es similar respecto al estudio de referencia en los varones (25,04±5,3 cm vs 26,2±4,2 cm), existiendo una tendencia (no significativa) a tener un menor crecimiento aquellos que inician el tratamiento en prepubertad (24,24±4,7 cm vs 26,2±4,2 cm, p=0,059). Sin embargo, las cifras de crecimiento en mujeres son menores (16,96±3,9 cm vs 20,3±4,4 cm), observando diferencias estadísticamente significativas con los valores de referencia en aquellas que inician tratamiento en prepubertad (16,74±3,9 cm versus 20,3±4,4 cm, p=0,00), y en pubertad (17,29±3,9 cm versus 20,3±4,4 cm, p=0,00) (Tabla 3). Una mayor GPT se correlaciona de manera estadísticamente significativa con una mejor talla final (r=0,507, p=0,00).

Tanto los pacientes que inician tratamiento en etapa prepuberal (N=86, TA-TG=0,14±0,7 DE) como en etapa puberal (N=53, TA-TG=-0,05±0,7 DE) alcanzan su talla genética, sin diferencias estadísticamente significativas entre ellos (p=0,126). Un inicio del tratamiento en la etapa prepuberal se asocia con una mejor respuesta final (TA con respecto a TI, p=0,001) (Tabla 4). Además, una mayor duración del mismo durante esta etapa se correlaciona de manera estadísticamente significativa con una mejor respuesta final(Tabla 5).

**Discusión**

El estudio incluye 139 pacientes tratados con rhGH durante al menos un año por DGH y que ya han alcanzado la casi-TA, lo que permite valorar la evolución de un número significativo de pacientes. Más de la mitad de los pacientes del estudio eran mujeres, porcentaje similar al observado en estudios previos como los realizados por Ranke *et al*(20,21), Ramchiel *et al*(22) o Straetemans *et al*(23), suponiendo un porcentaje mayor al que se observa en otros estudios con predominio del sexo masculino, como los realizados por Carrascosa *et al*(24,25) o Ariza *et al*(26). Este hecho puede ser debido al tamaño muestral del presente estudio, y probablemente con un incremento de la muestra esta proporción se igualaría. Sin embargo, el hecho de que haya más proporción de mujeres remarca la importancia de realizar un diagnóstico precoz, ya que al iniciar antes la pubertad, alcanzan antes la talla final, repercutiendo en los años potenciales totales de tratamiento.

Los beneficios del tratamiento con rhGH en el incremento de la VC están ampliamente demostrados en la literatura(7,10,11), y respaldan los resultados de este trabajo, en el que el tratamiento con rhGH consigue alcanzar una TA normal y en rango genético. Además, es fundamental conocer la adherencia al mismo para poder realizar este tipo de estudios, e incluir más parámetros que nos permitan realizar una valoración más integral(27).

La edad de inicio puberal en varones en este estudio fue similar a lo observado en otros estudios (3–5,19,28), salvo en el de Bundak *et al*(29), en cuya población los niños empiezan la pubertad más precozmente. Sin embargo, la edad de inicio puberal en mujeres fue superior a lo publicado(3,4,19) donde se aproxima a los 10 años, salvo en el estudio publicado por Maghnie(28) que muestra una edad media de 12,6 años. La edad ósea al inicio puberal estuvo en consonancia con los estudios de Ferrández, García-Cuartero y Maghnie(4,19,28). La talla y el IMC al inicio puberal de las mujeres del presente estudio fueron similares a lo revisado en la literatura(3,4,28). En varones, los valores de talla fueron inferiores a lo publicado por García Cuartero, Maghnie o Bundak (4,28,29), con tallas que se aproximan a los 147 cm, pero manteniendo un IMC similar. La edad media de la menarquia en este estudio fue superior a lo publicado por Carrascosa y Ferrández en sus estudios longitudinales(3,19), siendo de 12,9±1,1 y 12,6±0,9 respectivamente. El retraso en la edad de inicio puberal y de la menarquia en mujeres, superior a lo publicado en estudios longitudinales de niños sanos, probablemente esté en relación con la fisiopatología del DGH, ya que produce un fenotipo caracterizado por un hipocrecimiento armónico y postnatal, incluyendo retraso puberal(30) y retraso de la edad ósea(31). Sin embargo, a pesar de que la edad de inicio puberal y de la menarquia en las mujeres de nuestra muestra es superior a otras series, es importante remarcar que la duración total desde el inicio puberal hasta la aparición de la menarquia está en consonancia con lo publicado en otras series y con la población de referencia(3,19).

Múltiples trabajos apoyan que el inicio del tratamiento con rhGH a una edad temprana favorece que los pacientes alcancen una TA acorde a su TG. Así, el tratamiento debe iniciarse lo antes posible para lograr la máxima respuesta en el crecimiento(10,12). Un 61,9% de los pacientes iniciaron el tratamiento con rhGH en prepubertad, con una edad cronológica al inicio del tratamiento acorde con estudios como el de Ranke *et al*(32) o el estudio KIGS(33) en ambos sexos. Sin embargo, un 38,1% comenzaron el tratamiento tras el inicio puberal, ya que los primeros pacientes incluidos en el estudio son antiguos e iniciaron el tratamiento cuando apareció la indicación, no siendo reflejo de la situación actual, donde se realizan los diagnósticos precozmente, pero son útiles para comparar la respuesta al tratamiento. De hecho, es interesante destacar que se objetiva un descenso progresivo de la edad de inicio de tratamiento desde los primeros pacientes hasta los más recientes de esta muestra.

En el presente estudio se produjo una GPT en consonancia con los datos existentes en la literatura en los estudios de Maghnie y Bundak(28,29), pero superior a los presentados por García-Cuartero(4). Según los datos obtenidos en este estudio, una mayor GPT se correlaciona con una mejor talla final, lo que apoya lo presentado en otros trabajos como el de Ariza o Maghnie(26,28). Además, siendo un hecho no reseñado previamente por otros autores, se establece que la GPT fue mayor en los pacientes que iniciaron el tratamiento en la etapa puberal, mostrando la influencia de la pubertad sobre la talla final. Esto puede ser debido a que los pacientes que inician tratamiento en prepubertad han recuperado el déficit parcialmente antes de iniciar el desarrollo puberal, mientras que aquellos que lo inician en pubertad todavía no han iniciado la recuperación, por lo que la ganancia total durante la pubertad es mayor en estos últimos.

La duración del tratamiento en estadio prepuberal fue muy inferior a lo referido por Carrascosa en su estudio longitudinal, en el que era de 3,6 años(3). Esto es debido probablemente a que, como se ha comentado previamente, algunos de los pacientes del presente estudio son pacientes antiguos.

Múltiples estudios han relacionado un inicio del tratamiento en prepubertad con una respuesta final más favorable. En el trabajo realizado por Patel *et al*(13), se encontró que en pacientes con DGH, una menor edad y un estado prepuberal al inicio del tratamiento se relacionaba con un mejor resultado final. Root *et al*(12), en concordancia con el concepto de que la sensibilidad a la rhGH es mayor durante la infancia y que los esfuerzos terapéuticos para conseguir una mejor talla final deben centrarse en la etapa prepuberal, constató que el crecimiento recuperador de estos pacientes se logró durante la infancia, antes del inicio de la pubertad. Reiter *et al*(14) sugirió en su estudio que la exposición total a rhGH durante los años prepúberes puede ser un factor significativo en la mejor ganancia de talla final, objetivando que la ganancia de talla en estado prepuberal estuvo altamente correlacionada con la ganancia de talla total, confirmando la importancia del inicio del tratamiento antes de la pubertad. Además, Cavarzere(34) en un reciente estudio concluyó que la secreción de GH debe reevaluarse a mediados de la pubertad, para reducir posibles efectos secundarios y minimizar costes, sin afectar la talla final. Por tanto, la efectividad y costo-efectividad del tratamiento con rhGH es mayor en la etapa prepuberal(10,32). Así, y según lo observado en este trabajo, un inicio del tratamiento en la etapa prepuberal se correlaciona con una mejor respuesta final. Sin embargo, en el presente estudio se incluyen pacientes que inician el tratamiento en etapa prepuberal y puberal, observando una relación entre la respuesta final y el inicio de tratamiento en etapa prepuberal valorado mediante la diferencia de TA-TI. El resultado novedoso de este trabajo es que un diagnóstico de DGH en pubertad no debe limitar el tratamiento con rhGH, puesto que la respuesta al mismo también es adecuada, pero asumiendo que al ser de menor duración, será inferior que si se inicia en prepubertad.

Según el estudio realizado por Ranke *et al*(20), y basándose en el hecho de que la tasa de crecimiento disminuye con la edad durante la etapa prepuberal, se vio que dentro del grupo de pacientes que inició tratamiento prepubertad, la respuesta a rhGH fue mayor entre los pacientes más jóvenes. Siguiendo esta línea de trabajo, y según los resultados obtenidos en el presente estudio, dentro del grupo de pacientes que iniciaron el tratamiento en la etapa prepuberal, una mayor duración del mismo en este periodo se correlaciona con una mejor respuesta final.

En conclusión, los hallazgos de este estudio muestran que los pacientes que inician el tratamiento en la etapa prepuberal presentan una mejor respuesta final. Además, cuanto menor sea la edad de inicio y mayor sea la duración durante esta etapa, mejor será el resultado, aunque un diagnóstico de déficit de GH en pubertad no deber limitar el tratamiento con rhGH, puesto que la respuesta al mismo también es adecuada. Asimismo, una mayor ganancia de talla durante la pubertad conseguirá una mejor talla final. Estos resultados avalan lo publicado en otros estudios, siendo de gran utilidad, ya que pueden ayudar en la toma de decisión sobre el momento más adecuado para comenzar el tratamiento, y obtener un mayor beneficio.

**Bibliografía**

1. García Cuartero B. Índice de masa corporal, índice de masa triponderal y patrón de crecimiento puberal. Nuevos datos en población española. An Pediatría. 2018;89(3):135–6.

2. Carrascosa A, Audí L, Bosch-Castañé J, Gussinyé M, Yeste D, Ángeles Albisu M, et al. Influencia de la edad de inicio del brote de crecimiento puberal en la talla adulta. Med Clin. 2008;130(17):645–9.

3. Carrascosa A, Yeste D, Moreno-Galdó A, Gussinyé M, Ferrández Á, Clemente M, et al. Crecimiento puberal de 1.453 niños sanos según la edad de inicio de la pubertad. Estudio longitudinal de Barcelona. An Pediatría. 2018;89(3):144–52.

4. García Cuartero B, Gónzalez Vergaz A, Frías García E, Arana Cañete C, Díaz Martínez E, Tolmo MD. Valoración de la tendencia secular de la pubertad en niños y niñas. An Pediatría. 2010;73(6):320–6.

5. Ranke MB, Lindberg A, Martin DD, Bakker B, Wilton P, Albertsson-Wikland K, et al. The Mathematical Model for Total Pubertal Growth in Idiopathic Growth Hormone (GH) Deficiency Suggests a Moderate Role of GH Dose. J Clin Endocrinol Metab. 2003;88(10):4748–53.

6. Sevilla Ramos MP, Alija Merillas MJ, López Andrés N. Diagnóstico de talla baja en consulta de endocrinología pediátrica de un hospital provincial secundario. Rev Esp Endocrinol Pediatr. 2014;5(2):9–17.

7. Diago Cabezudo JI, Carrascosa Lezcano A, del Valle Núñez CJ, Ferrández Longás A, Gracia Bouthelier R, Pombo Arias M. Talla baja idiopática: definición y tratamiento. An Pediatría. 2006;64(4):360–4.

8. Stagi S, Scalini P, Farello G, Verrotti A. Possible effects of an early diagnosis and treatment in patients with growth hormone deficiency: the state of art. Ital J Pediatr. 2017;43(1):81.

9. Audí L, Fernández-Cancio M, Camats N, Carrascosa A. Growth hormone deficiency: an update. Minerva Endocrinol. 2013 ;38(1):1-16.

10. Richmond E, Rogol AD. Treatment of growth hormone deficiency in children, adolescents and at the transitional age. Best Pract Res Clin Endocrinol Metab. 2016;30(6):749–55.

11. Wilson TA, Rose SR, Cohen P, Rogol AD, Backeljauw P, Brown R, et al. Update of guidelines for the use of growth hormone in children: the Lawson Wilkins Pediatric Endocrinology Society Drug and Therapeutics Committee. J Pediatr. 2003;143(4):415–21.

12. Root AW, Dana K, Lippe B. Treatment of growth hormone-deficient infants with recombinant human growth hormone to near-adult height: patterns of growth. Horm Res Paediatr. 2011;75(4):276–83.

13. Patel L, Clayton PE. Predicting Response to Growth Hormone Treatment. Indian J Pediatr. 2012;79(2):229–37.

14. Reiter EO, Price DA, Wilton P, Albertsson-Wikland K, Ranke MB. Effect of Growth Hormone (GH) Treatment on the Near-Final Height of 1258 Patients with Idiopathic GH Deficiency: Analysis of a Large International Database. J Clin Endocrinol Metab. 2006;91(6):2047–54

15. Sánchez González E, Carrascosa Lezcano A, Fernández García JM, Ferrández Longás A, López de Lara D, López-Siguero JP. Estudios españoles de crecimiento: situación actual, utilidad y recomendaciones de uso. An Pediatría. 2011;74(3):193.e1-193.e16.

16. Carrascosa A. Secular growth acceleration in Spain. Spanish Growth Studies 2010. Spanish-born population and immigrant population. Endocrinol y Nutr English Ed. 2014 May 1;61(5):229–33.

17. Greulich W, Pyle S. Radiographic atlas of skeletal development of the hand and wrist. 2nd ed. Stanford: Stanford University Press; 1959.

18. Bayley N, Pinneau SR. Tables for predicting adult height from skeletal age: revised for use with the Greulich-Pyle hand standards. J Pediatr. 1952;40(4):423–41.

19. Ferrández Longás A, Baguer L, Labarta JI, Labena C, Mayayo E, Puga B, et al. Longitudinal study of normal spanish children from birth to adulthood anthropometric, puberty, radiological and intellectual data. Pediatr Endocrinol Rev 2005;2(Suppl 4):423-642.

20. Ranke MB, Lindberg A, Albertsson-Wikland K, Wilton P, Price DA, Reiter EO. Increased response, but lower responsiveness, to growth hormone (GH) in very young children (aged 0-3 years) with idiopathic GH Deficiency: analysis of data from KIGS. J Clin Endocrinol Metab. 2005;90(4):1966–71.

21. Ranke MB, Traunecker R, Martin DD, Schweizer R, Schwarze CP, Wollmann HA, et al. IGF-I and IGF binding protein-3 levels during initial GH dosage step-up are indicators of GH sensitivity in GH-deficient children and short children born small for gestational age. Horm Res. 2005;64(2):68–76.

22. Rachmiel M, Rota V, Atenafu E, Daneman D, Hamilton J. Final Height in Children with Idiopathic Growth Hormone Deficiency Treated with a Fixed Dose of Recombinant Growth Hormone. Horm Res Paediatr. 2007;68(5):236–43.

23. Straetemans S, Thomas M, Craen M, Rooman R, De Schepper J, BESPEED. Poor growth response during the first year of growth hormone treatment in short prepubertal children with growth hormone deficiency and born small for gestational age: a comparison of different criteria. Int J Pediatr Endocrinol. 2018;2018(1):9.

24. Carrascosa A, Audí L, Fernández-Cancio M, Yeste D, Gussinye M, Albisu MA, et al. Growth hormone secretory status evaluated by growth hormone peak after two pharmacological growth hormone release stimuli did not significantly influence the two-year catch-up growth induced by growth hormone therapy in 318 prepubertal short children with. Horm Res Paediatr. 2011;75(2):106–14.

25. Carrascosa A, Audí L, Fernández-Cancio M, Yeste D, Gussinye M, Campos A, et al. Height gain at adult-height age in 184 short patients treated with growth hormone from prepubertal age to near adult-height age is not related to GH secretory status at GH therapy onset. Horm Res Paediatr. 2013;79(3):145–56.

26. Ariza Jiménez AB, Martínez-Aedo Ollero MJ, López-Siguero JP. Eficacia y seguridad del tratamiento sustitutivo en el déficit aislado de hormona del crecimiento. An Pediatría. 2019;90(5):285–92.

27. de Arriba Muñoz A, Muñiz VC, Saez JJA, Beisti A, Llovet E, Aizpún JIL. Impact of adherence on growth response during the first 2 years of growth hormone treatment. Endocrine. 2020.

28. Maghnie M, Ambrosini L, Cappa M, Pozzobon G, Ghizzoni L, Ubertini MG, et al. Adult Height in Patients with Permanent Growth Hormone Deficiency with and without Multiple Pituitary Hormone Deficiencies. J Clin Endocrinol Metab. 2006;91(8):2900–5.

29. Bundak R, Darendeliler F, Gunoz H, Bas F, Saka N, Neyzi O. Analysis of puberty and pubertal growth in healthy boys. Eur J Pediatr. 2007;166(6):595–600.

30. Guerrero-Fdez J, González Casado I, Barreda Bonis A, Itza Martín N, Mora Palma C, Salamanca Fresno L. Manual de diagnóstico y terapeútica en Endocrinología Pediátrica. 1st ed. Madrid: Ergon; 2018. 24–34 p.

31. Reinehr T, Carlsson M, Chrysis D, Camacho-Hübner C. Adult height prediction by bone age determination in children with isolated growth hormone deficiency. Endocr Connect. 2020;9(5):370–8.

32. Ranke MB, Lindberg A. Observed and Predicted Total Pubertal Growth during Treatment with Growth Hormone in Adolescents with Idiopathic Growth Hormone Deficiency, Turner Syndrome, Short Stature, Born Small for Gestational Age and Idiopathic Short Stature: KIGS Analysis and Revi. Horm Res Paediatr. 2011;75(6):423–32.

33. Cutfield W, Lindberg A, Wikland KA, Chatelain P, Ranke M, Wilton P. Final height in idiopathic growth hormone deficiency: the KIGS experience. Acta Paediatr. 1999;88(s428):72–5.

34. Cavarzere P, Gaudino R, Sandri M, Ramaroli DA, Pietrobelli A, Zaffanello M, et al. Growth hormone retesting during puberty: A cohort study. Eur J Endocrinol. 2020;182(6):559–67.

**Figura 1.** Distribución de los pacientes.

aLHRH: análogos de hormona liberadora de la hormona luteinizante.

**Figura 2.** Principales características descriptivas y su evolución durante el seguimiento dividido por sexos.

Tabla 1.

Datos del nacimiento, tallas de los padres y talla genética, expresadas en valor absoluto y en desviaciones estándar.

|  | | |  | N | Media | Desviación típica |
| --- | --- | --- | --- | --- | --- | --- |
| Peso RN | | | gramos | 139 | 2,97 | 0,51 |
| DE | -0,63 | 1,08 |
| Longitud RN | | | cm | 139 | 48,45 | 1,83 |
| DE | -0,70 | 1,01 |
| IMC RN | | | kg/m2 | 139 | 12,75 | 1,44 |
| DE | -0,25 | 1,23 |
| Talla paterna | | | cm | 139 | 168,97 | 6,05 |
| DE | -1,32 | 0,95 |
| Talla materna | | | cm | 139 | 155,83 | 6,32 |
| DE | -1,36 | 1,01 |
| Talla genética | varones | Inicio rhGH prepubertad | cm | 30 | 167,50 | 4,7 |
| DE | -1,55 | 0,75 |
| Inicio rhGH pubertad | cm | 13 | 168,23 | 4,23 |
| DE | -1,44 | 0,66 |
| mujeres | Inicio rhGH prepubertad | cm | 56 | 156,98 | 4,67 |
| DE | -1,19 | 0,78 |
| Inicio rhGH pubertad | cm | 40 | 155,94 | 3,89 |
| DE | -1,37 | 0,65 |

DE: Desviación Estándar, RN: recién nacido, IMC: Índice de masa corporal, cm: centímetros.

Tabla 2.

Evolución de los valores medios y desviación típica de la talla en función del inicio de tratamiento con rhGH en prepubertad o pubertad, expresadas en desviaciones estándar.

|  | | 1 año antes | | Inicio tratamiento | | Inicio puberal | | Adulto | |
| --- | --- | --- | --- | --- | --- | --- | --- | --- | --- |
| x̄ | σ | x̄ | σ | x̄ | σ | x̄ | σ |
| Talla DE | Grupo total | -2,41 | 0,46 | -2,51 | 0,47 | -2,11 | 0,58 | -1,28 | 0,57 |
| Inicio rhGH prepubertad | -2,46 | 0,41 | -2,55 | 0,46 | -1,96 | 0,61 | -1,18 | 0,57 |
| Inicio rhGH pubertad | -2,31 | 0,53 | -2,44 | 0,49 | -2,37 | 0,43 | -1,43 | 0,54 |

x̄: media aritmética. σ: desviación típica. DE: Desviación Estándar.

Tabla 3.

Valores medios y desviación típica de la ganancia puberal total, en función del inicio del tratamiento con rhGH, expresada en cm y DE y dividido por sexos, y comparado con los valores del "Estudio longitudinal de niños españoles normales desde el

nacimiento hasta la edad adulta"(19).

|  | | | Talla adulta - Talla inicio puberal | | Valores de normalidad | | p |
| --- | --- | --- | --- | --- | --- | --- | --- |
| x̄ | σ | x̄ | σ |
| Inicio del tratamiento en etapa prepuberal | Varones | cm | 24,24 | 4,7 | 26,2 | 4,2 | 0,059 |
| DE | 0,68 | 0,6 |  |  |
| Mujeres | cm | 16,74 | 3,9 | 20,3 | 4,4 | **0,000** |
| DE | 0,83 | 0,6 |  |  |
| Inicio del tratamiento en etapa puberal | Varones | cm | 26,9 | 6,2 | 26,2 | 4,2 | 0,883 |
| DE | 0,89 | 0,5 |  |  |
| Mujeres | cm | 17,29 | 3,9 | 20,3 | 4,4 | **0,000** |
| DE | 0,94 | 0,7 |  |  |

x̄: media aritmética, σ: desviación típica, DE: Desviación Estándar, p: nivel de significación. Se considera significación estadística p<0,05.

Tabla 4.

Relación entre la respuesta final al tratamiento en función del inicio del mismo en la etapa prepuberal o puberal.

|  | | Talla adulta -  Talla genética  (DE) | | | Talla adulta - Pronóstico de crecimiento  (DE) | | | Talla adulta -  Talla al inicio del tratamiento  (DE) | | | Talla adulta -  Talla al inicio puberal  (DE) | | |
| --- | --- | --- | --- | --- | --- | --- | --- | --- | --- | --- | --- | --- | --- |
| x̄ | σ | p | x̄ | σ | p | x̄ | σ | p | x̄ | σ | p |
| Inicio del tratamiento en etapa prepuberal | sí | 0,14 | 0,7 | 0,121 | 0,99 | 0,7 | 0,122 | 1,38 | 0,5 | **0,001** | 0,78 | 0,6 | 0,173 |
| no | -0,05 | 0,7 | 0,81 | 0,6 | 1 | 0,6 | 0,92 | 0,6 |

x̄: media aritmética, σ: desviación típica, DE: Desviación Estándar, p: nivel de significación. Se considera significación estadística p<0,05.

Tabla 5.

Correlaciones entre años de tratamiento en etapa prepuberal y variables de respuesta final al tratamiento, en el grupo de inicio del tratamiento en etapa prepuberal.

|  | | Talla adulta -  Talla genética  (DE) | | Talla adulta - Pronóstico de crecimiento  (DE) | | Talla adulta -  Talla al inicio del tratamiento  (DE) | | Talla adulta -  Talla al inicio puberal  (DE) | |
| --- | --- | --- | --- | --- | --- | --- | --- | --- | --- |
| r | p | r | p | r | p | r | p |
| Años en tratamiento prepuberal | Grupo total | 0,082 | 0,34 | 0,187 | 0,04 | 0,328 | **0,00** | -0,326 | **0,00** |
| Mujeres | 0,038 | 0,71 | 0,230 | 0,03 | 0,366 | **0,00** | -0,288 | **0,00** |
| Varones | 0,130 | 0,40 | -0,01 | 0,99 | 0,303 | **0,04** | -0,397 | **0,00** |

DE: Desviación Estándar, r: coeficiente de correlación de Pearson, p: nivel de significación. Se considera significación estadística p<0,05.
